# Supplementary material for: Efficacy and safety of artemether–lumefantrine, artesunate–amodiaquine, and dihydroartemisinin–piperaquine for the treatment of uncomplicated Plasmodium falciparum malaria in three provinces in Angola, 2017
Source: Malar J. 2018 Apr 3;17:144. doi: 10.1186/s12936-018-2290-9 (PMC5883595; doi:10.1186/s12936-018-2290-9)
Supplement: Supplementary file 2 — Additional file 2. Microsatellite marker results, Angola therapeutic efficacy monitoring, 2017. [file 12936_2018_2290_MOESM2_ESM.xls]

## Sheet: Table S1
Additional File 1. Lengths of neutral microsatellite markers for Day 0 and day of failure for cases of late treatment failures and randomly selected Day 0 samples from participants without treatment failure, Angola therapeutic efficacy monitoring, 2017.
		Chromosome	2			3			6			4					12				10		6				Recrudescence
																											0.991989
		Tandem Repeats	AT				TA			ATT		ATT					TAA				TAA		AAT				Reinfection
		Locus	313 C2			383 C3			TA1			POLYA					PFPK2				2490		TA109				0.00400534
Province	Drug	Sample ID																									Probability of Recrudescence
		Late Treatment Failures
Benguela	ASAQ	BQ17-269_D0	223.4			103.7	140.3		169			167.3					149.8	158	171.2		81.6		164.6	175			0
		BQ17-269_D28	225.5			124.1	162.3		178			171					162	159			81.8		161.6	172.5
	DP	BD17-040_D0	229.3			139.1			175			144					171	168			82	78	149.6	159.9			0
		BD17-040_D42	243.6			139			175			164					171				82		175.7	187.2
		BD17-083_D0	221.3			151.6			165.2	180.6		170.2					168.2	177.3	180.3		81.8		164.2	175			0
		BD17-083_D42	231.5			145			162.7	165.6		104.8	112.3				168	162			79		149.4	160
		BD17-085_D0	261.7			122.6			162.7			167.1					194.7				78.6		147.9	158.8			0
		BD17-085_D35	239.6			124			162.7			173					189				88		170	181.4
		BD17-087_D0	261.7			124	89		162.7			167.3					186	191.9	194.8		78.6		148.6	159.9			0
		BD17-087_D35	245.3			123.6	140.2		163	184		155					168.2	174.2	177.2		82		152.4	163.1
		BD17-090_D0	238.4			87	123.9		180.8			151.3					161.9				81.7		148.8	160.4			0.02
		BD17-090_D42	219.4	249.7		87	123.6		165.8	177.9		151.3	164				161.9	168.1			81.7		163.2	175.3
Lunda Sul	AL	LL17-209_D0	245.6			123.6			177.7			176.6					171.2				81.7		163.7	175.2			1
		LL17-209_D21	245.7			123.5			177.8			176.6					171.3				81.7		163.6	175.3
		LL17-229_D0	237			138			175			154					162				81.8		164.4	175.4			0.04
		LL17-229_D17	217			128			160			167					164				81.8		163.6	175.4
		LL17-248_D0	221.2			107.7	143.5		181.5			170.1	189.4				185.9	191.8			81.7		149.9	160.1			0
		LL17-248_D28	219.4			100	135.9		173			151.2	160.7				186	165			81.7		167.1	178.1
		LL17-254_D0	225.2			155.7			166.7			154.4					165				81.8		210.7				0
		LL17-254_D28	237.4	247.2		151			170			170					159				81.7		161.5	172.5
		LL17-267_D0	239.1			101.8	140.5		165.9			154.4					168	171.1	174		78.6		152.6	163.3			0.01
		LL17-267_D28	225.3			101.7	140.2		160			155					177.2	180.1			82		152.5	163.3
		LL17-274_D0	217.3			87	122.6		159.6			147.8					165	156			72.2		152.4	163.1			1
		LL17-274_D21	217.2			87	122.4		159.5			147.7					165				72.4		151.9	163.1
		LL17-290_D0	259.5			87.1	123.9		159.4			164					161.9				72.3		148.5	159.6			1
		LL17-290_D21	259.5			87	123.5		159.4			164					161.9				72.3		149.3	160
		LL17-298_D0	235.2			170.3			162.6			154.6	157.6				165				81.8		175.4				0
		LL17-298_D28	219.4			140.3			166	172		164					158.9	168.1			81.8		202.3	205.1
		LL17-300_D0	235.2			123.5	147		159.8			176.4					161.8	177.2			81.8		160.9	172.1			0.01
		LL17-300_D21	231.4			154			165.6			148					189				81.7		160.8	172.3
Zaire	AL	ZL17-019_D0	221.3			138			177.8			179.4					161	158.6	152		81.8		151.8	163.1			0.92
		ZL17-019_D28	221.2			138.1			177.7			179.4					161.7				81.7		151.6	163.1
		ZL17-027_D0	217.3	233.2		101.8	138		163	140		160.7	166.9				174	181.8			78.6	81.8	172.2	187	184		0.99
		ZL17-027_D21	217.3	233.2		101.8	138		163			161	167				178	183	168		78.5	81.7	163.2	187.3
		ZL17-030_D0	215.4	241.3		140.3			162.6	183.7		173.3					162	171.2			81.8		149.6	160.4	172.6		1
		ZL17-030_D28	225.4	241		140	130		140.4	183.9		173					162	171.1			81.8		149.6	160.4	172.6
		ZL17-034_D0	229.1			140	124	162	162.9			154.3	163.8				168				81.7		195.5				0.29
		ZL17-034_D28				140			166								168.1	171			81.8		152.6	163	178.1
		ZL17-041_D0	239			87	123.6		160			151					161	154			78.5		163.6	175.2			0
		ZL17-041_D28	239			136			160			151					162				82		149.4	160.4
		ZL17-066_D0	233.4			97.8	136.1		172	166		154.4					186	162			81.7		172.2	184.2			1
		ZL17-066_D28	233.3			97.6	135.8		172			154.4					186				81.7		172.8	184.3
		ZL17-082_D0	221.4			140			174.9			164					171.1				81.7		160.5	172.2			0.05
		ZL17-082_D28	251.3			101.9	138.3		166			154.6					168				79		148.4	160
	ASAQ	ZQ17-201_D0	225			135.8			172.5			147.6					137				72.4		152.5	164.3			0
		ZQ17-201_D21	261			123.6			159			144					136.5	171			79		161.5	172.3
		ZQ17-206_D0	225.2			138.8	172		165.2			154.4					171				82		148.9	160.4			1
		ZQ17-206_D21	225			138.7	171.5		165.2			154.4					171						149.3	158.9
		ZQ17-212_D0	251			101.7	136.9		186.4			120.1	147.7				161.7	164			81.8		148.9	159.2			0
		ZQ17-212_D28	231	256		123.5			178			151					162	164.9			79		160.2	173	184
		ZQ17-214_D0	241.2			148.1			177.5			166.9					168				81.8		164.3	175.4			0
		ZQ17-214_D28	243			122.6			172			154					162.1	164.1			79		163.7	175.2
		ZQ17-221_D0	233.3			142.5			183.9			157.6					188.7				81.6		166.6	178.2			0
		ZQ17-221_D21				149.4			166			151					174				79		152.2	163.2
		ZQ17-222_D0	243			99.7	139		169.4			154.2					164.9				81.8		164.7	175.5			0.01
		ZQ17-222_D21	235			99.7	139.1		193			144					158.8	168.2	171		81.7		160.1	167.2	172	178
		ZQ17-225_D0	221			84.7	123.8		159.4	177.7	183.8	137.5	147.7	157.6	167	182	159				81.8		160.3	172.5			0.39
		ZQ17-225_D28	221	239		101.8	140.4	151.6	159.4	177.6		154					159	143	161.6		79		160.3	172.5
		ZQ17-227_D0	217			138.1			168.1			141.1	179.4				188.5				82		148.9	160.2			0
		ZQ17-227_D28	229			138			140	163		155					159				82	85	169.5	181.4
		ZQ17-229_D0	217			140.3			175			152					147				81.7		163.5	175.4			0
		ZQ17-229_D21	217			140.3			175			152					174				81.9		146.4	157.1
		ZQ17-238_D0	223.3	232.2		101.7	140.3		168.7	180.7		170	179.2				168	177	180		78.6	81.8	172.3	175.3			1
		ZQ17-238_D21	223.3	232.2		101.6	140.2		168.7	180.6		170.1	179.2				168.1	177	180		78.6	81.7	172.2	175.2
		ZQ17-251_D0	217	225		84.7	123.6	135.9	162.5	165.6	171.6	144.5	151.2	160.8			165	168.1	174.2		81.7		160.1	172.3			0
		ZQ17-251_D21	211	245		105.7	142.6		136.2	171.3		147.9	151.2				162	182.7			81.6		166.3	184.4
		ZQ17-259_D0	225	237		130.6	142.4		142.8	165.5			151				162	180.2			82		164.4	172.3	175.3		0
		ZQ17-259_D21	229			89.2	123.7	139	160			139					159				82	85	149.6	159.2
		ZQ17-261_D0	244			165			160			154					162				79		164.1	175.2			1
		ZQ17-261_D21	244			165			160			154					162				79		164.1	175.2
		ZQ17-277_D0	230			103.7	143.6		159.7	171.3		147.9	167				159.6	165	168.5		82		172.4	184.4			0.19
		ZQ17-277_D21	231			87.2	123.5		178			151					159.2	162.3	165	168.1	79		172.4	184.4
		ZQ17-284_D0	221			87	123.3	135.8	159.7			167	158				168	171	162		78.6		161.4	172.1	178.2		0.98
		ZQ17-284_D21	225			123.6			160			167					168	171			78.6		161.4	172.2
		ZQ17-293_D0	217			85	121.7		168.6			173.3					162				81.8		164.1	175.3			1
		ZQ17-293_D21	217			84.9	121.6		168.6			173.1					162				81.8		163.7	175.2
		Randomly selected day 0 samples from participants not experiencing treatment failure
Benguela	ASAQ	BQ17-213_D0	218			145			178			164					150	156			82		164	175
		BQ17-247_D0	245			164			175			158					183	185			78		172	161
		BQ17-256_D0	221			140			169	201	178	158	154	144			168	171	165		82		172	184	162
		BQ17-265_D0	240			124	140		172			154					156	171			82		148	159
		BQ17-271_D0				140			74			151									82		196
		BQ17-286_D0	223			136			178			154					177	179			81		149	160
		BQ17-303_D0	232			146			169			167					164	171			72		164	175
	DP	BD17-014_D0	223	239		124	146		74	175	178	164					174	180			72		172	163
		BD17-038_D0	245			151			169			174	176				162				72		168	178
		BD17-041_D0	250			123			163			154					198	200			82		164	175
		BD17-047_D0	226			124	171		160	172		154	151				162	165	174	177	82	78	164	160
		BD17-066_D0	224			149			166			161					177				85		152	163
		BD17-082_D0	262			104	140		178			158					139	142			81		148	160
		BD17-098_D0	220			104	140		172			179	151				161	174			78		172	162
Lunda Sul	AL	LL17-207_D0	245			124			169			158					165				78		149	159
		LL17-212_D0	242	276		145			166			144	154	164			168	177			82		172	162	166
		LL17-260_D0	211			139	145		169	178		151	164				156	177			72		153	175	163
		LL17-266_D0	233	258		124			166	172	178	137	164	167	170		162	168	174		81		160	181	166
		LL17-276_D0	259			152			74	172		151					158				82		164	175
		LL17-302_D0	219			140			168			154					165	167			78		170	181
	DP	LD17-035_D0	234			140			160			182					182				78		164	175
		LD17-061_D0	233	249		138			175	187		161					171				81		149	160
		LD17-065_D0	225			124			175			154					162	164			82		165	175
		LD17-072_D0	260			147			175			158					174	180			82		172	162
		LD17-076_D0	220	246		124	137		181			158	164				159	168			78	82	172	208
ASAQ: artesunate-amodiaquine; AL: artemether-lumefantrine; DP: dihydroartemisinin-piperaquine
